# Supplementary material for: Functional Electrical Stimulation: A Possible Strategy to Improve Muscle Function in Central Core Disease?
Source: PubMed Central journal article supplement (PMC6548841; doi:10.3389/fneur.2019.00479), 2019-05-29
Supplement: Image_1.pdf [file Image_1.pdf]

## Supplementary Material

**Figure S1:** *Histological images in cross section of muscle biopsy before (T0) beginning of FES training.*

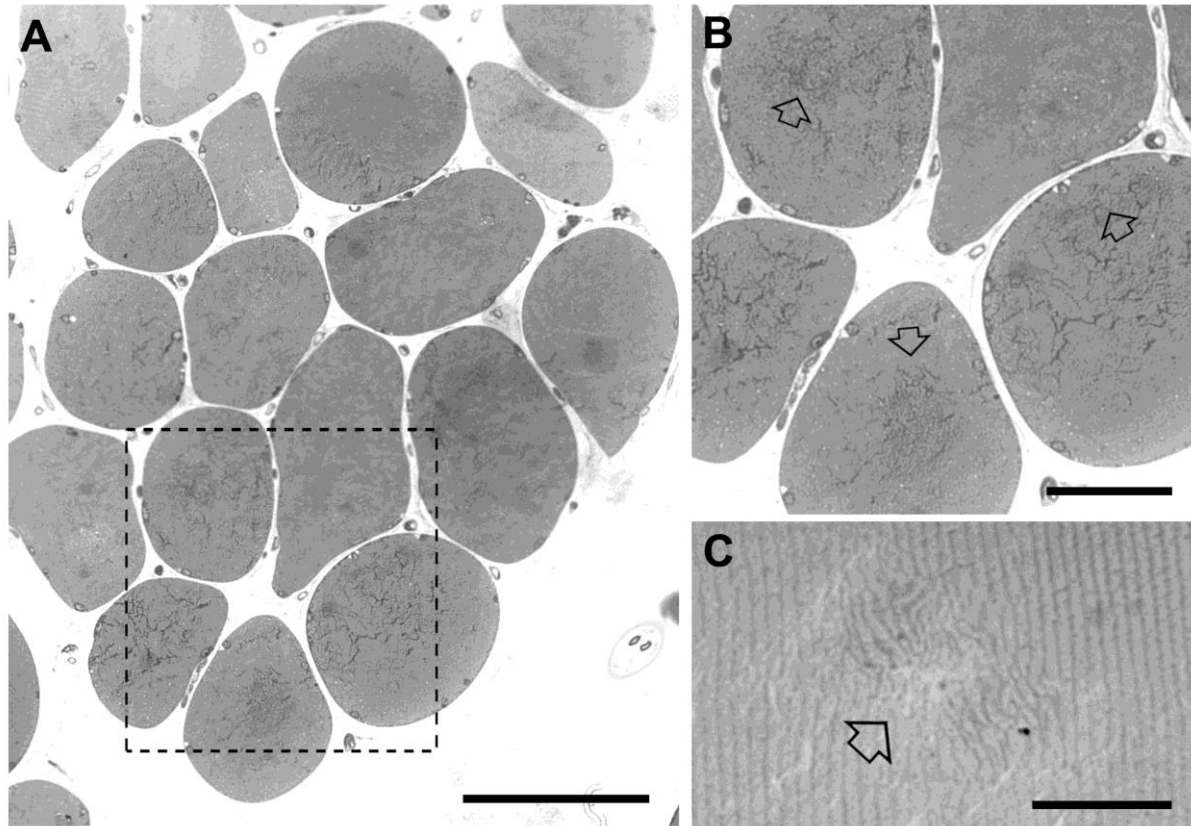

Arrows in point to internal fiber areas in which disarray of the contractile elements is more evident. Scale bars: A, 100  $\mu\text{m}$ ; B, 40  $\mu\text{m}$ ; C, 20 $\mu\text{m}$ .
