# Supplementary material for: Functional Electrical Stimulation: A Possible Strategy to Improve Muscle Function in Central Core Disease?
Source: PubMed Central journal article supplement (PMC6548841; doi:10.3389/fneur.2019.00479), 2019-05-29
Supplement: Table_1.pdf [file Table_1.pdf]

## Supplementary Materials

**Table S1:** *Cross-sectional area of quadriceps and hamstring assessed by MRI.*

|                                        | T1     |        | T2     |        | T3     |        |
|----------------------------------------|--------|--------|--------|--------|--------|--------|
|                                        | Rx Leg | Lx Leg | Rx Leg | Lx Leg | Rx Leg | Lx Leg |
| Quadriceps (cm <sup>2</sup> )          | 51.52  | 45.81  | 64.27  | 60.99  | 66.77  | 63.45  |
| Hamstrings (cm <sup>2</sup> )          | 37.41  | 45.49  | 38.44  | 47.67  | 36.01  | 45.42  |
| Tot. Mass (cm <sup>2</sup> )           | 260.18 | 273.16 | 310.45 | 312.27 | 260.93 | 272.46 |
| Fat-Free (cm <sup>2</sup> )            | 88.93  | 91.3   | 102.71 | 108.66 | 102.78 | 108.87 |
| <b>Fat-Fraction</b> (cm <sup>2</sup> ) | 171.25 | 181.86 | 207.74 | 203.61 | 158.15 | 163.59 |
| % Fat-Free Mass                        | 34.18  | 33.42  | 33.08  | 34.80  | 39.39  | 39.96  |

Cross-sectional area of thigh muscles analysis after 5 (panel A; T1), 14 (panel B; T2), and 26 months (panel C; T3) of home-based FES home-based. Total Mass, Fat-Free, and **Fat-Fraction** of right (Rx) and left (Lx) thigh muscles are reported for each time points.
